# Supplementary figures and images for: Repeatability and sensitivity to change of non-invasive end points in PAH: the RESPIRE study
Source: HighWire-hosted journal article supplement (doi:10.1136/thoraxjnl-2020-216078), 2021-02-25

# RESPIRE study: Sensitivity and repeatability of non-invasive endpoints

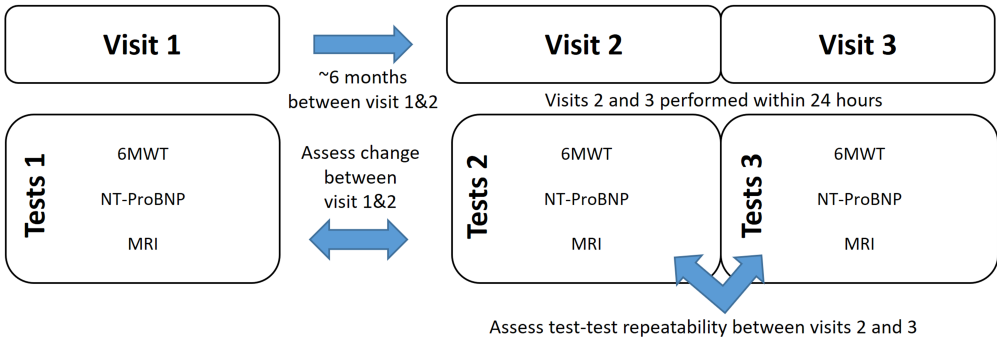

Supplement: thoraxjnl-2020-216078supp002_data_supplement.pdf [file thoraxjnl-2020-216078supp002_data_supplement.pdf]

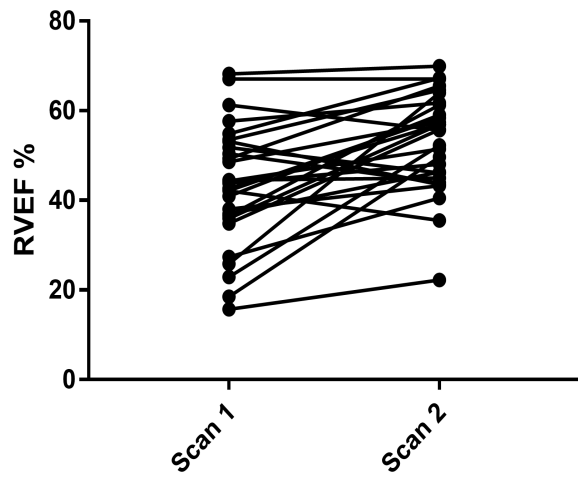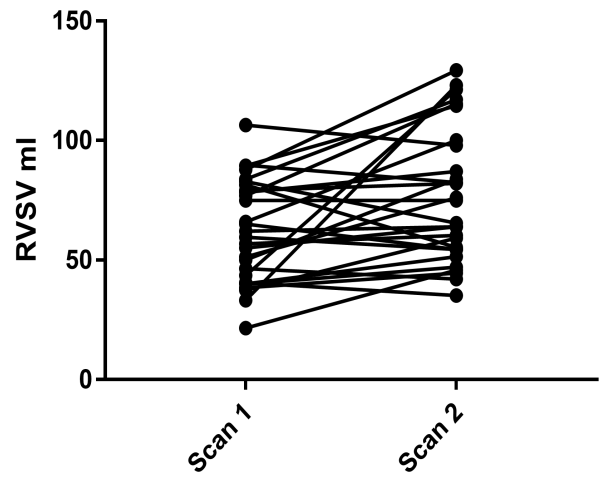

Supplement: thoraxjnl-2020-216078supp004_data_supplement.pdf [file thoraxjnl-2020-216078supp004_data_supplement.pdf]
